# Supplementary material
Source: PubMed Central journal article supplement (PMC2278030)

**Cellular Distribution of PARP-1 in A549 cells over the time period of treatment with TNF**

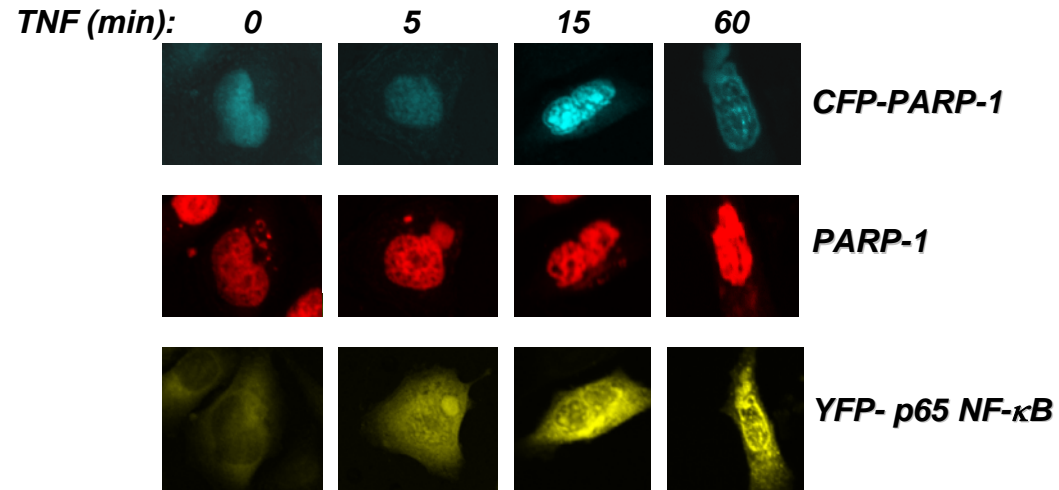

***A549 cells were transfected and treated as described for Fig. 3C after which, cells were subjected to immunofluorescence with antibodies to mouse PARP-1. Cells were then examined by fluorescence microscopy.***

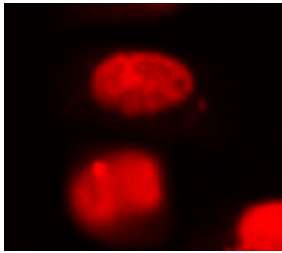

Supplement: NIHMS37365-supplement-01.pdf [file NIHMS37365-supplement-01.pdf]
